# Supplementary material for: Maintenance of Postharvest Quality and Reactive Oxygen Species Homeostasis of Pitaya Fruit by Essential Oil p-Anisaldehyde Treatment
Source: MDPI journal article supplement (doi:10.3390/foods10102434), 2021-10-13
Supplement: s1 [file s1]

## Supplementary Data

**Table S1.** Primers sequence used for qRT-PCR in this study.

| Gene name      | Primer sequence (5'-3')     | Primer sequence (3'-5')     |
|----------------|-----------------------------|-----------------------------|
| <i>HpPOD</i>   | <i>CCATCCCAAATCGCACTATA</i> | <i>TAAAGTACGACTCCTGGCTA</i> |
| <i>HpSOD</i>   | <i>GAAGCACCATCAGACTTACA</i> | <i>GCCATTGAACTTGATAGCAC</i> |
| <i>HpCAT</i>   | <i>ATGGCATGAAATTCCTGAT</i>  | <i>GAACATGTGCAGACTTTCAG</i> |
| <i>HpAPX</i>   | <i>CTTCAAGGAGCTACTGAGTG</i> | <i>AGCAGCATATTTCTCAACCA</i> |
| <i>HpGR</i>    | <i>ACGTACTGATCATGGTGAAG</i> | <i>GTAACATCACCAATAGCCCA</i> |
| <i>HpDHAR</i>  | <i>GAGAAATACCCAGATCCACC</i> | <i>TCCTGTTCTTTCCATCGTT</i>  |
| <i>HpMDHAR</i> | <i>GCTTCCAGAACCTTCCATTA</i> | <i>TTACAGACAATGCAGAGCTT</i> |
